# Supplementary material for: Minor compositional alterations in faecal microbiota after five weeks and five months storage at room temperature on filter papers
Source: PubMed Central journal article supplement (PMC6908594; doi:10.1038/s41598-019-55469-0), 2019-12-12

## SUPPLEMENTARY INFORMATION FOR THE MANUSCRIPT

Minor compositional alterations in faecal microbiota after five weeks and five months storage at room temperature on filter papers (SREP-19-24101).

### Authors

Sebastian von Huth<sup>1,3</sup>, Louise Bruun Thingholm<sup>2,3</sup>, Corinna Bang<sup>2</sup>, Malte C. Rühlemann<sup>2</sup>, Andre Franke<sup>2</sup>, Uffe Holmskov<sup>1\*</sup>

### Author affiliations

<sup>1</sup> Cancer and Inflammation Research, Department of Molecular Medicine, University of Southern Denmark, J. B. Winslows Vej 25.3, DK-5000 Odense C, Denmark.

<sup>2</sup> Institute of Clinical Molecular Biology, Christian Albrechts University of Kiel, Rosalind-Franklin-Str. 12, 24105 Kiel, Germany.

<sup>3</sup> These authors contributed equally to this work and share first authorship.

\* Corresponding author.

Correspondence to [uholmkskov@health.sdu.dk](mailto:uholmkskov@health.sdu.dk)

File list:

- **Supplementary Table 1:** Summary statistics for analysis of alpha-diversity, Firmicutes/Bacteroidetes-ratio, pairwise dissimilarity, and dispersion.
- **Supplementary Table 2:** Altered taxa upon five weeks and five months storage at RT.
- **Supplementary Figure 1:** Jaccard similarity based MDS and relative abundance of core class-level taxa.
- **Supplementary Figure 2:** Dispersion between storage methods and storage duration.
- **Supplementary Figure 3:** Hierarchical cluster analysis of paired fresh-frozen and filter-paper stored samples from 19 subjects after 5 weeks and 5 months of storage.
- **Supplementary Figure 4:** Alpha diversity and F/B-ratio for each sample across subjects.

**Supplementary Table 1: Altered taxa upon five weeks and five months storage at RT.** Single taxa at the genera, family, class and phyla levels were evaluated for association with storage method (A) and storage time (B) using a both paired Wilcoxon signed rank test and analysis of composition of microbiomes (ANCOM). All taxa with Wilcoxon adjusted  $p < 0.1$  are listed along with results from ANCOM. A) Four genera, marked with red font, are significantly altered by RT storage for five weeks (TP1) on FOBT-cards, and five genera are significantly altered after five months (TP2) (Wilcoxon adjusted  $p < 0.05$ ). After five months, two family and two class-level taxa, respectively, deviated in relative abundance between storage methods, while no single taxa differed after five weeks. As indicated in **Supplementary Figure 1B**, Negativicutes and Betaproteobacteria were found to deviate at TP2. Relative abundances of associated genera are seen in **Figure 2**. B) Single taxa at the genera, family and class levels were evaluated for association with storage time when stored as fresh-frozen samples (left) or using filter-paper (right). While two genera and five class-level taxa deviated significantly in relative abundance between TP1 and TP2 in fresh-frozen samples, no single taxa deviated significantly in abundance between TP1 and TP2 when stored using filter-paper (Wilcoxon adjusted  $p < 0.05$ ).

| A) Association with storage method |                               |                           |                |          |                  |           |                             |                             |                           |                |          |                  |           |                             |
|------------------------------------|-------------------------------|---------------------------|----------------|----------|------------------|-----------|-----------------------------|-----------------------------|---------------------------|----------------|----------|------------------|-----------|-----------------------------|
| Level                              | Timepoint 1                   |                           |                |          |                  |           | Timepoint 2                 |                             |                           |                |          |                  |           |                             |
|                                    | Taxa                          | Wilcoxon signed rank test |                |          |                  | ANCOM     |                             | Taxa                        | Wilcoxon signed rank test |                |          |                  | ANCOM     |                             |
|                                    |                               | Statistic                 | Location shift | p-value  | Adjusted p-value | Statistic | Detected shift (cutoff 0.6) |                             | Statistic                 | Location shift | p-value  | Adjusted p-value | Statistic | Detected shift (cutoff 0.6) |
| Genus                              | <i>g.Anaerostipes</i>         | 188                       | 0,277          | 1,14E-05 | 4,22E-04         | 32        | TRUE                        | <i>g.Anaerostipes</i>       | 175                       | 0,352          | 5,23E-04 | 7,96E-03         | 21        | FALSE                       |
|                                    | <i>g.Blaugia</i>              | 186                       | 0,783          | 2,67E-05 | 4,94E-04         | 23        | TRUE                        | <i>g.Dialister</i>          | 16                        | -6,63          | 6,45E-04 | 7,96E-03         | 13        | FALSE                       |
|                                    | <i>g.Fusicatenibacter</i>     | 171                       | 0,409          | 1,17E-03 | 1,44E-02         | 19        | FALSE                       | <i>g.Odoribacter</i>        | 177                       | 0,242          | 3,36E-04 | 7,96E-03         | 16        | FALSE                       |
|                                    | <i>g.Faecalibacterium</i>     | 169                       | 2,4            | 1,69E-03 | 1,56E-02         | 2         | FALSE                       | <i>g.Fusicatenibacter</i>   | 171                       | 0,819          | 1,17E-03 | 1,08E-02         | 25        | TRUE                        |
|                                    | <i>g.Clostridium_XVIII</i>    | 160                       | 0,269          | 7,14E-03 | 5,28E-02         | 9         | FALSE                       | <i>g.Sutterella</i>         | 154                       | 4,76           | 3,06E-03 | 2,26E-02         | 19        | FALSE                       |
|                                    | <i>g.Collinsella</i>          | 155                       | 0,493          | 1,41E-02 | 7,45E-02         | 14        | FALSE                       | <i>g.Butyricimonas</i>      | 158                       | 0,206          | 9,45E-03 | 5,83E-02         | 1         | FALSE                       |
|                                    | <i>g.Lachnospiraceae_ince</i> | 155                       | 0,518          | 1,41E-02 | 7,45E-02         | 2         | FALSE                       | <i>g.Clostridium_XIVa</i>   | 35                        | -0,428         | 1,41E-02 | 7,45E-02         | 12        | FALSE                       |
| Family                             |                               |                           |                |          |                  |           |                             | <i>f.Sutterellaceae</i>     | 183                       | 4,96           | 7,25E-05 | 1,38E-03         | 17        | TRUE                        |
|                                    |                               |                           |                |          |                  |           |                             | <i>f.Veillonellaceae</i>    | 13                        | -6,8           | 3,36E-04 | 3,19E-03         | 12        | TRUE                        |
| Class                              |                               |                           |                |          |                  |           |                             | <i>c.Negativicutes</i>      | 1                         | -6,83          | 7,63E-06 | 8,39E-05         | 7         | TRUE                        |
|                                    |                               |                           |                |          |                  |           |                             | <i>c.Betaproteobacteria</i> | 184                       | 5,79           | 5,34E-05 | 2,94E-04         | 9         | TRUE                        |
| Phyla                              |                               |                           |                |          |                  |           |                             | <i>p.Bacteroidetes</i>      | 145                       | 7,52           | 4,46E-02 | 7,43E-02         | 3         | TRUE                        |
|                                    |                               |                           |                |          |                  |           |                             | <i>p.Firmicutes</i>         | 31                        | -11,6          | 8,23E-03 | 2,06E-02         | 2         | FALSE                       |
|                                    |                               |                           |                |          |                  |           |                             | <i>p.Proteobacteria</i>     | 172                       | 5,95           | 9,65E-04 | 4,83E-03         | 4         | TRUE                        |
|                                    |                               |                           |                |          |                  |           |                             | <i>p.Verrucomicrobia</i>    | 27                        | -0,513         | 6,49E-02 | 8,11E-02         | 1         | FALSE                       |

  

| B) Association with storage time |                              |                           |                |          |                  |           |                             |                        |                           |                |          |                  |           |                             |
|----------------------------------|------------------------------|---------------------------|----------------|----------|------------------|-----------|-----------------------------|------------------------|---------------------------|----------------|----------|------------------|-----------|-----------------------------|
| Level                            | Fresh-frozen samples         |                           |                |          |                  |           | Filter-paper samples        |                        |                           |                |          |                  |           |                             |
|                                  | Taxa                         | Wilcoxon signed rank test |                |          |                  | ANCOM     |                             | Taxa                   | Wilcoxon signed rank test |                |          |                  | ANCOM     |                             |
|                                  |                              | Statistic                 | Location shift | p-value  | Adjusted p-value | Statistic | Detected shift (cutoff 0.6) |                        | Statistic                 | Location shift | p-value  | Adjusted p-value | Statistic | Detected shift (cutoff 0.6) |
| Genus                            | <i>g.Anaerostipes</i>        | 12                        | 0,0931         | 2,67E-04 | 6,22E-03         | 21        | FALSE                       |                        |                           |                |          |                  |           |                             |
|                                  | <i>g.Blaugia</i>             | 13                        | 0,496          | 3,36E-04 | 6,22E-03         | 18        | FALSE                       |                        |                           |                |          |                  |           |                             |
|                                  | <i>g.Akkermansia</i>         | 16                        | 0,555          | 7,74E-03 | 7,16E-02         | 7         | FALSE                       |                        |                           |                |          |                  |           |                             |
|                                  | <i>g.Odoribacter</i>         | 160                       | -0,278         | 7,14E-03 | 7,16E-02         | 17        | FALSE                       |                        |                           |                |          |                  |           |                             |
| Family                           | <i>f.Coriobacteriaceae</i>   | 29                        | 0,541          | 6,18E-03 | 7,35E-02         | 4         | FALSE                       |                        |                           |                |          |                  |           |                             |
|                                  | <i>f.Verrucomicrobiaceae</i> | 16                        | 0,555          | 7,74E-03 | 7,35E-02         | 4         | FALSE                       |                        |                           |                |          |                  |           |                             |
| Class                            | <i>c.Actinobacteria</i>      | 28                        | 0,623          | 5,33E-03 | 2,84E-02         | 4         | FALSE                       | <i>c.Negativicutes</i> | 161                       | -2,36          | 6,18E-03 | 6,80E-02         | 0         | FALSE                       |
|                                  | <i>c.Betaproteobacteria</i>  | 166                       | -2,74          | 2,84E-03 | 2,84E-02         | 9         | TRUE                        |                        |                           |                |          |                  |           |                             |
|                                  | <i>c.Verrucomicrobiae</i>    | 16                        | 0,555          | 7,74E-03 | 2,84E-02         | 3         | FALSE                       |                        |                           |                |          |                  |           |                             |
|                                  | <i>c.Alphaproteobacteria</i> | 81                        | -0,0551        | 1,44E-02 | 3,96E-02         | 8         | TRUE                        |                        |                           |                |          |                  |           |                             |
|                                  | <i>c.Bacteroidia</i>         | 153                       | -11            | 1,81E-02 | 3,98E-02         | 4         | FALSE                       |                        |                           |                |          |                  |           |                             |
| Phyla                            | <i>p.Actinobacteria</i>      | 28                        | 0,623          | 5,33E-03 | 1,94E-02         | 2         | FALSE                       |                        |                           |                |          |                  |           |                             |
|                                  | <i>p.Bacteroidetes</i>       | 156                       | -12,7          | 1,24E-02 | 2,07E-02         | 3         | TRUE                        |                        |                           |                |          |                  |           |                             |
|                                  | <i>p.Firmicutes</i>          | 48                        | 10,9           | 6,02E-02 | 7,52E-02         | 2         | FALSE                       |                        |                           |                |          |                  |           |                             |
|                                  | <i>p.Verrucomicrobia</i>     | 16                        | 0,555          | 7,74E-03 | 1,94E-02         | 2         | FALSE                       |                        |                           |                |          |                  |           |                             |
|                                  | <i>p.Proteobacteria</i>      | 125                       | -2,17          | 2,41E-01 | 2,41E-01         | 3         | TRUE                        |                        |                           |                |          |                  |           |                             |

Location shift: positive means increase in filter-paper

**Supplementary Table 2: Summary statistics for analysis of alpha-diversity, Firmicutes/Bacteroidetes-ratio, pairwise dissimilarity, and dispersion.** **A)** Phylogenetic diversity, as a measure of alpha diversity, was evaluated for association with storage time and method using a paired Wilcoxon signed rank test. **B)** Firmicutes/Bacteroidetes (F/B) ratio was evaluated for association with storage time and method using a paired Wilcoxon signed rank test. **C)** Differences in pairwise Bray-Curtis dissimilarities between samples stored (i) with same or different storage method and (ii) for the same or different time duration, was compared using linear mixed-effects models as described in Methods. **D)** Groups dispersions (variances) were compared with groups defined by timepoint or storage method. Significance of the difference in dispersion between groups was estimated using ANOVA (Methods). SE: standard error. Sum Sq: sum of squares.

| <b>A) Alpha diversity</b>                         | <b>(pseudo)median</b> | <b>p-value</b> |
|---------------------------------------------------|-----------------------|----------------|
| Comparing storage methods, across all samples     | -0,789                | 4,64E-01       |
| Comparing storage methods, at TP1                 | -0,364                | 8,91E-01       |
| Comparing storage methods, at TP2                 | -0,030                | 2,41E-01       |
| Comparing timepoints, across filter-paper samples | 2,694                 | 9,65E-04       |
| Comparing timepoints, across fresh-frozen samples | 4,239                 | 3,12E-01       |

  

| <b>B) F/B-ratio</b>                              | <b>(pseudo)median</b> | <b>p-value</b> |
|--------------------------------------------------|-----------------------|----------------|
| Between timepoints, across filter-paper samples  | 0,183                 | 7,99E-02       |
| Between timepoints, across fresh-frozen samples  | -0,843                | 9,65E-04       |
| Between storage methods, at TP1                  | 0,313                 | 1,82E-01       |
| Between storage methods, at TP2                  | -0,593                | 1,41E-03       |
| Between storage methods, across both TP1 and TP2 | -0,211                | 1,80E-01       |

  

| <b>C) Linear mixed-effects models (LMM)</b>                           | <b>Bray-Curtis</b> |           |                |                |           | <b>Jaccard</b>  |           |                |                |           |
|-----------------------------------------------------------------------|--------------------|-----------|----------------|----------------|-----------|-----------------|-----------|----------------|----------------|-----------|
|                                                                       | <b>Estimate</b>    | <b>SE</b> | <b>t-value</b> | <b>p-value</b> | <b>R2</b> | <b>Estimate</b> | <b>SE</b> | <b>t-value</b> | <b>p-value</b> | <b>R2</b> |
| Microbiota association with storage time, across filter-paper samples | -0,0026            | 0,0049    | -0,544         | 5,86E-01       | 0,00014   | -0,0029         | 0,0050    | -0,584         | 5,59E-01       | 0,00014   |
| Microbiota association with storage time, across fresh-frozen samples | -0,0238            | 0,0056    | -4,217         | 2,93E-05       | 0,01012   | -0,0238         | 0,0053    | -4,513         | 8,00E-06       | 0,0107    |
| Microbiota association with storage method, at TP1                    | -0,0164            | 0,0072    | -2,276         | 2,33E-02       | 0,00501   | -0,0184         | 0,0070    | -2,650         | 8,31E-03       | 0,0066    |
| Microbiota association with storage method, at TP2                    | -0,0462            | 0,0044    | -10,57         | <2E-16         | 0,04949   | -0,0457         | 0,0043    | -10,64         | <2E-16         | 0,0498    |

  

| <b>D) Dispersion</b>                            | <b>Bray-Curtis</b> |                    |                | <b>Jaccard</b> |                    |                |
|-------------------------------------------------|--------------------|--------------------|----------------|----------------|--------------------|----------------|
|                                                 | <b>Sum Sq</b>      | <b>F-statistic</b> | <b>p-value</b> | <b>Sum Sq</b>  | <b>F-statistic</b> | <b>p-value</b> |
| Between storage methods, at TP1                 | 0,06465            | 15,235             | 1,00E-03       | 0,0558         | 14,431             | 0,001          |
| Between storage methods, at TP2                 | 0,00062            | 0,1367             | 7,02E-01       | 0,0009         | 0,1996             | 0,623          |
| Between timepoints, across fresh-frozen samples | 0,02133            | 4,5593             | 3,90E-02       | 0,0159         | 3,9892             | 0,06           |
| Between timepoints, across filter-paper samples | 0,00694            | 1,6933             | 1,77E-01       | 0,0065         | 1,5648             | 0,204          |

**Supplementary Figure 1: Jaccard similarity based MDS and relative abundance of core class-level taxa.** **A)** Jaccard similarity based MDS plot of genera community coloured by storage method and timepoint (red (TP1) and green (TP2) for filter paper; turquoise (TP1) and purple (TP2) for fresh-frozen) with individual samples and centroids connected for each group. The panel highlight the shift in location of fresh-frozen samples at TP2, as was also observed using Bray-Curtis dissimilarity. **B)** Relative abundance of core class-level taxa across 76 samples (19 subjects) clustered by storage method (fresh-frozen and filter-paper samples). Ten most abundant taxa are annotated and coloured as listed.

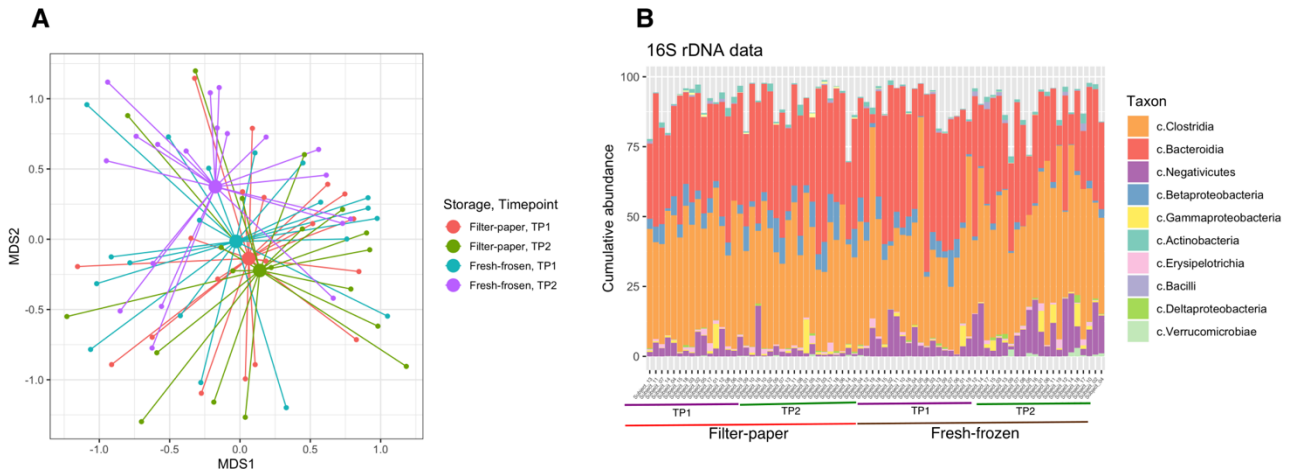

**Supplementary Figure 2: Dispersion between storage methods and storage duration.** Groups dispersions (variances) were evaluated using betadisper function in R package vegan (type = "centroid") with groups defined by timepoint (**A**) or storage method (**B**). Significance of the difference in dispersion between groups was estimated using the anova function in R package stats. The analysis showed a reduced dispersion for filter-paper samples as compared to conventionally stored samples at TP1, while there was no significant difference at TP2 ( $p < 0.05$  and  $p > 0.05$ , respectively). When comparing dispersion between timepoints (**B**), we found a slight but significant difference for fresh-frozen samples, but no difference for filter-paper samples ( $p < 0.05$  and  $p > 0.05$ , respectively).

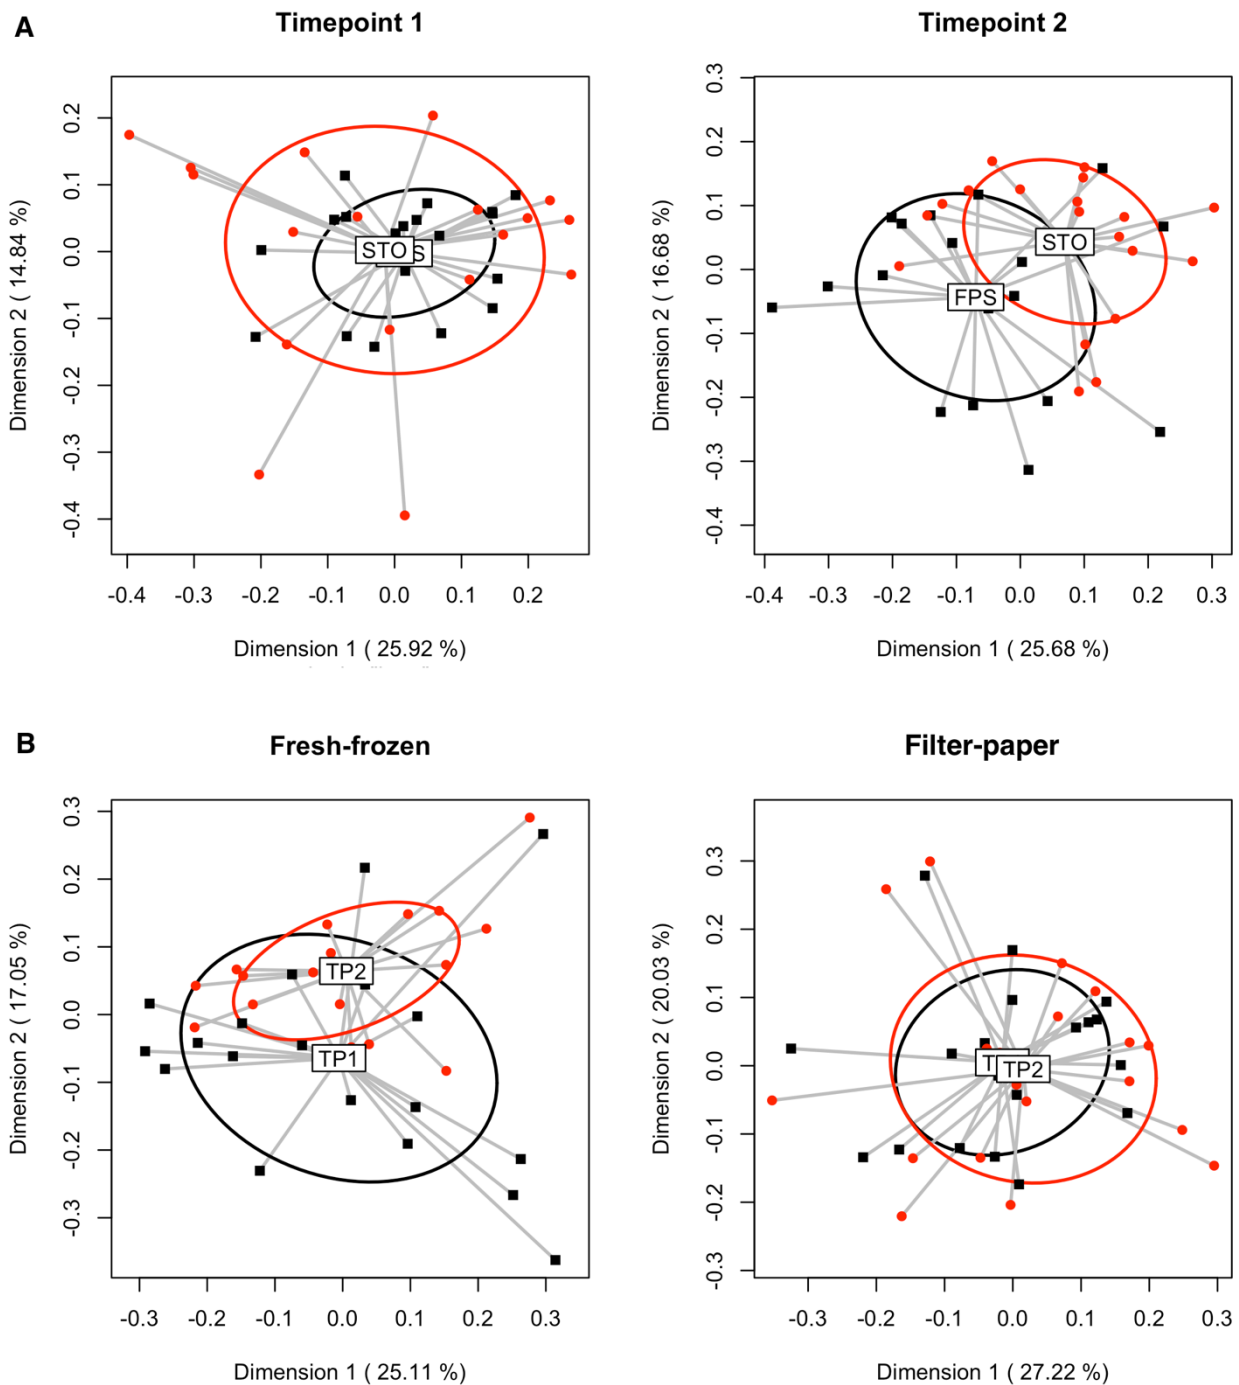

**Supplementary Figure 3: Hierarchical cluster analysis of paired fresh-frozen and filter-paper stored samples from 19 subjects after 5 weeks and 5 months of storage.** The analysis was performed at each timepoint, and showed subject-distinctive clusters for 12 of 19 subjects at TP1 (A) and 14 of 19 subjects at TP2 (B). The analysis was performed using the hclust function in R package stats, Bray-Curtis and average agglomeration method, square root transformed genera. The hclust object was transformed to a dendrogram using the function as.dendrogram and plotted using plot both from the R package stats. Coloured bars for subject and storage method were then added using the function colored\_bars in R package dendextend.

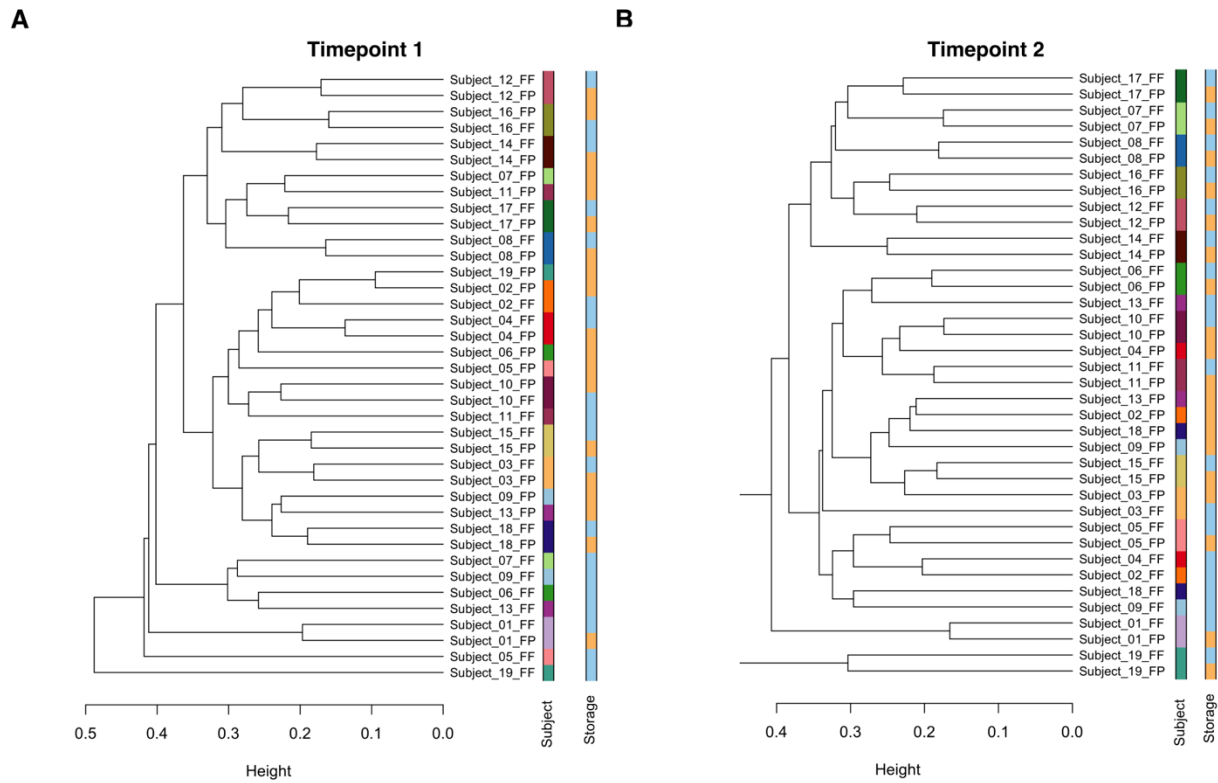

**Supplementary Figure 4: Alpha diversity and F/B-ratio for each sample across subjects. A)** Phylodiversity as a measure of alpha diversity across 19 subjects with one box for each sample (storage type: fresh-frozen=brown, filter-paper=grey; timepoint: TP1=light colour, TP2=dark colour) and horizontal lines indicating storage mean (fresh-frozen=brown, filter-paper=grey). **B)** Similar plot to A, however depicting the Firmicutes/Bacteroidetes (F/B) ratio across the 19 samples (colours as in panel A).

**A**

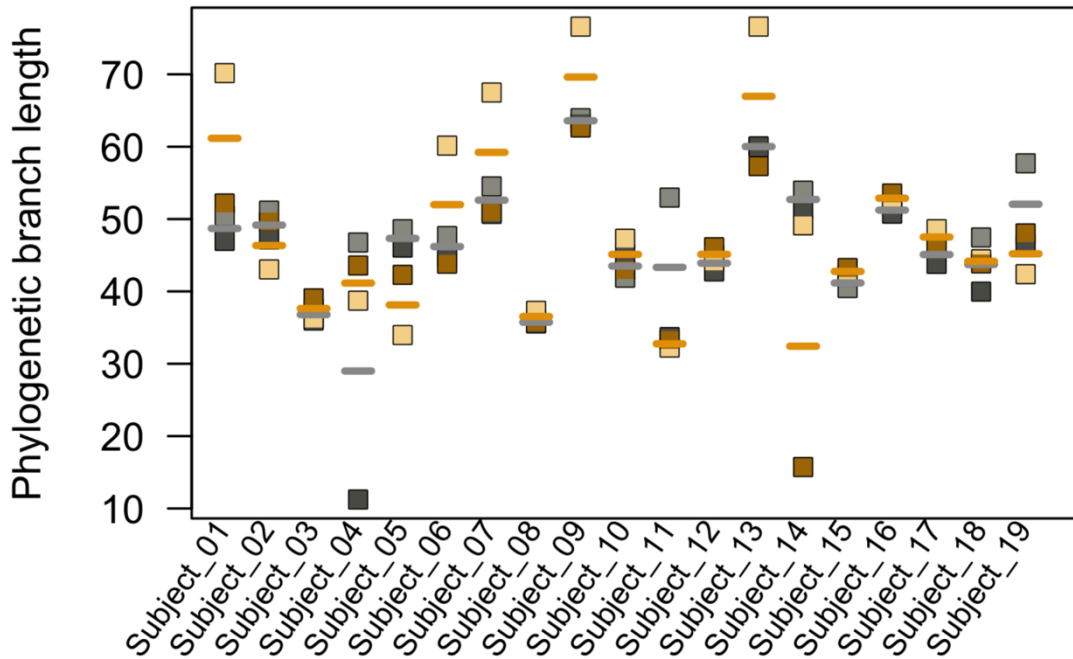

**B**

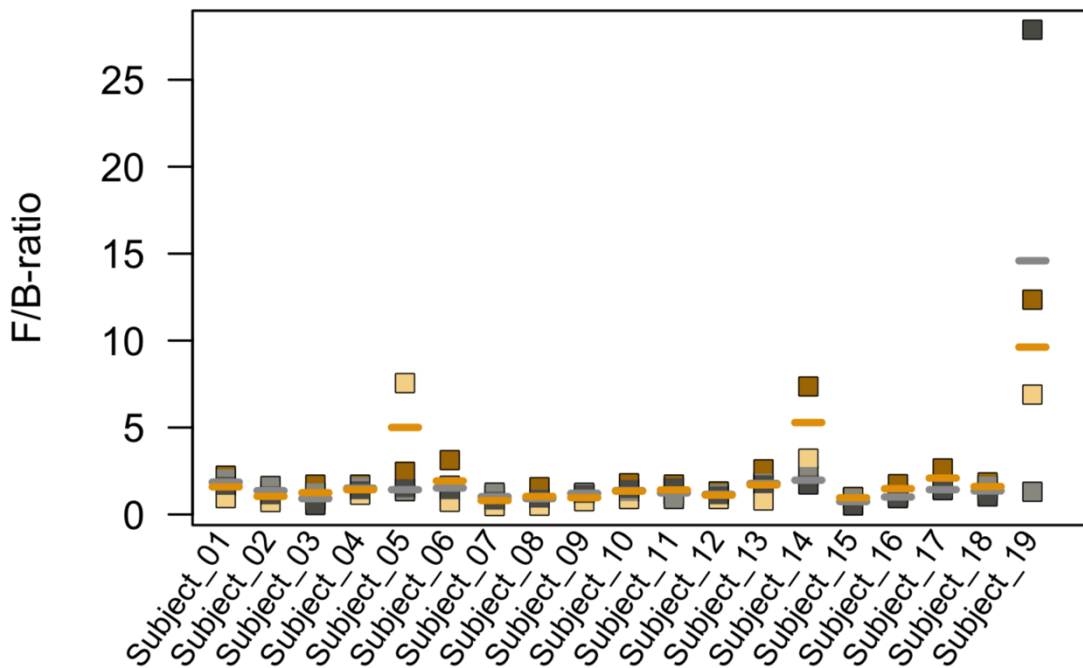

Supplement: 41598_2019_55469_MOESM1_ESM.pdf [file 41598_2019_55469_MOESM1_ESM.pdf]
